# Supplementary material for: 3D alginate hydrogel microspheres with uniform micro-structure for cell culture and CVB3 infection
Source: Research Square preprint supplement (doi:10.21203/rs.3.rs-7659713/v1), 2025-10-12
Supplement: Supplementary file 1 [file a6d66fcd855ff0169d6906bb.docx]

**Supporting Information**

**Supplementary Figures：**


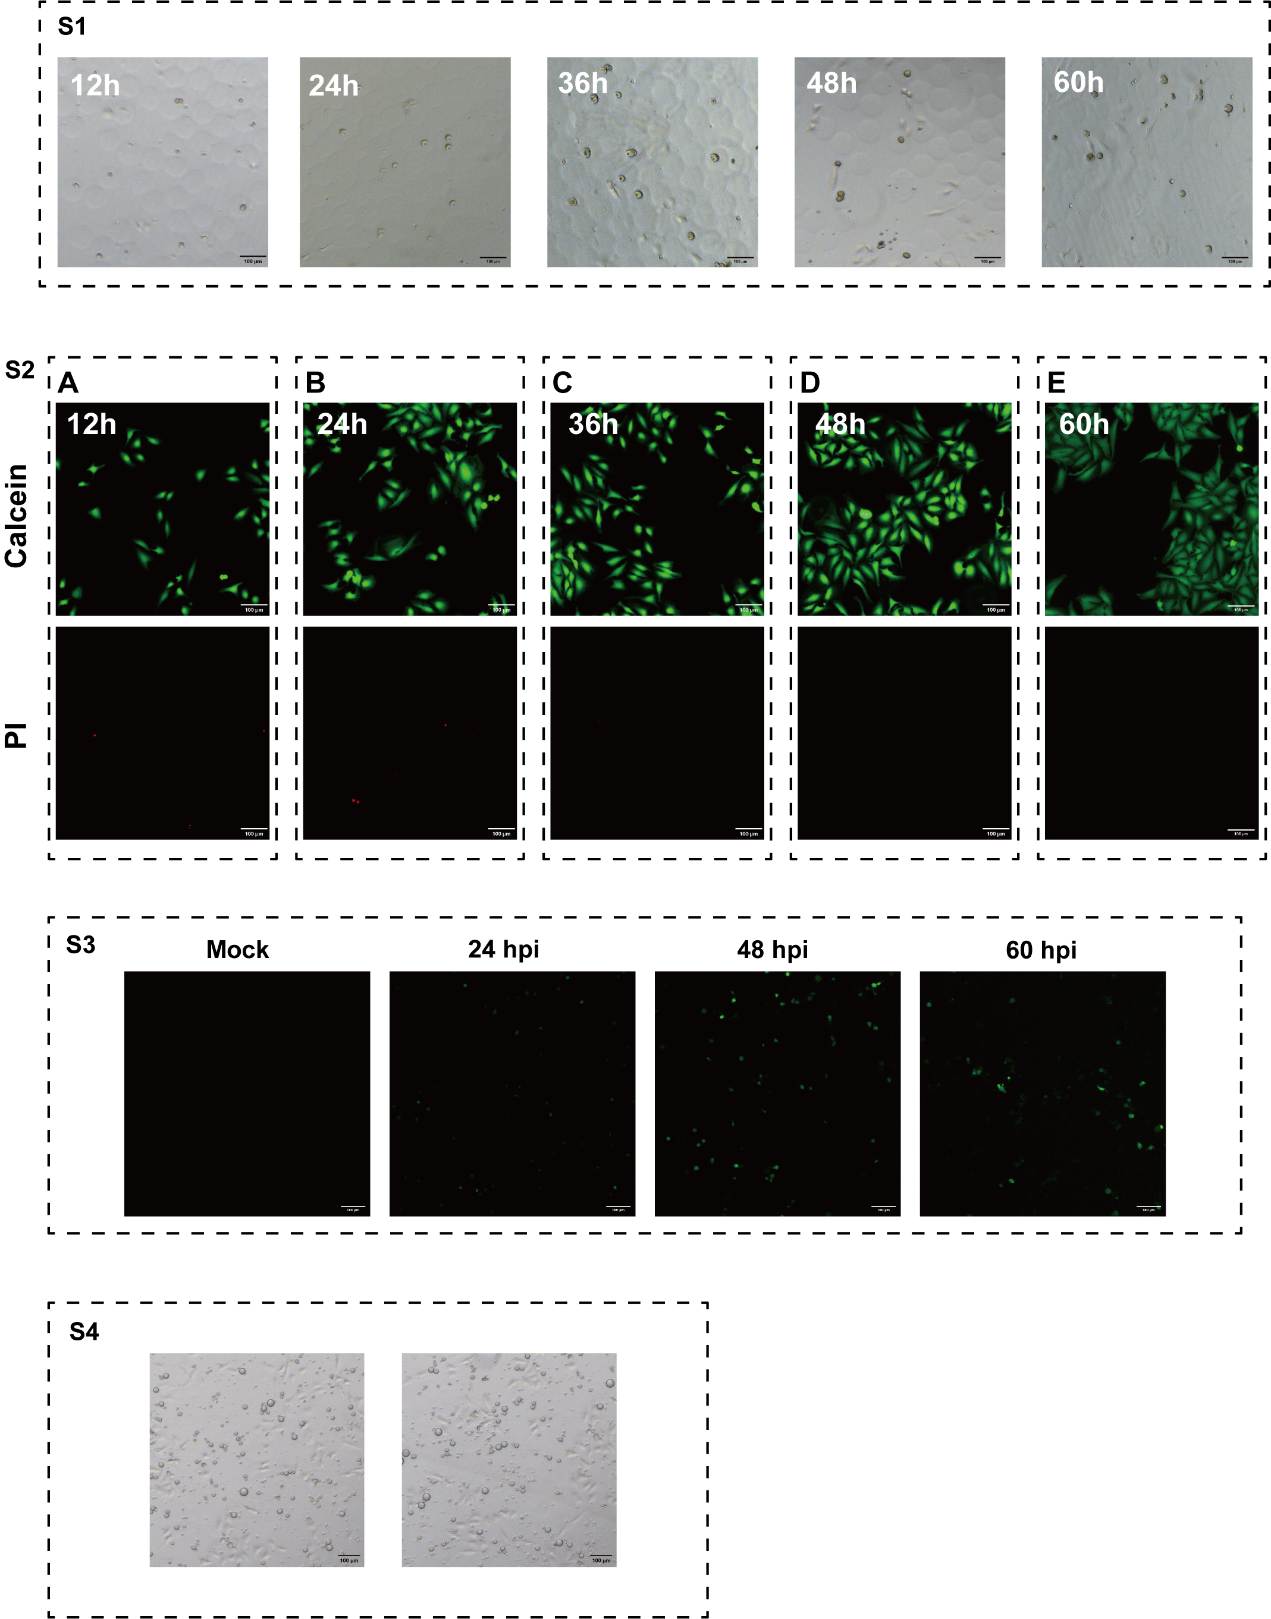


**S1 Growth of HeLa cells in 3D culture.**

Bright-field image of cell-cultivation within 60h. Scale bar = 100 μm

**S2 Conventional plate-based HeLa cell culture**

Green fluorescence indicates live cells, and red fluorescence indicates dead cells. Scale bar = 100 μm.

**S3 CVB3-eGFP infection to HeLa cells cultivated by conventional plate.**

Images of CVB3-eGFP infection to HeLa cells. Scale bar = 100 μm.

**S4 3D culture of HeLa cells using 0.4% alginate.**

Bright-field image of cell-cultivation within 12h**.** Scale bar = 100 μm

**Full uncropped Blots images**

**
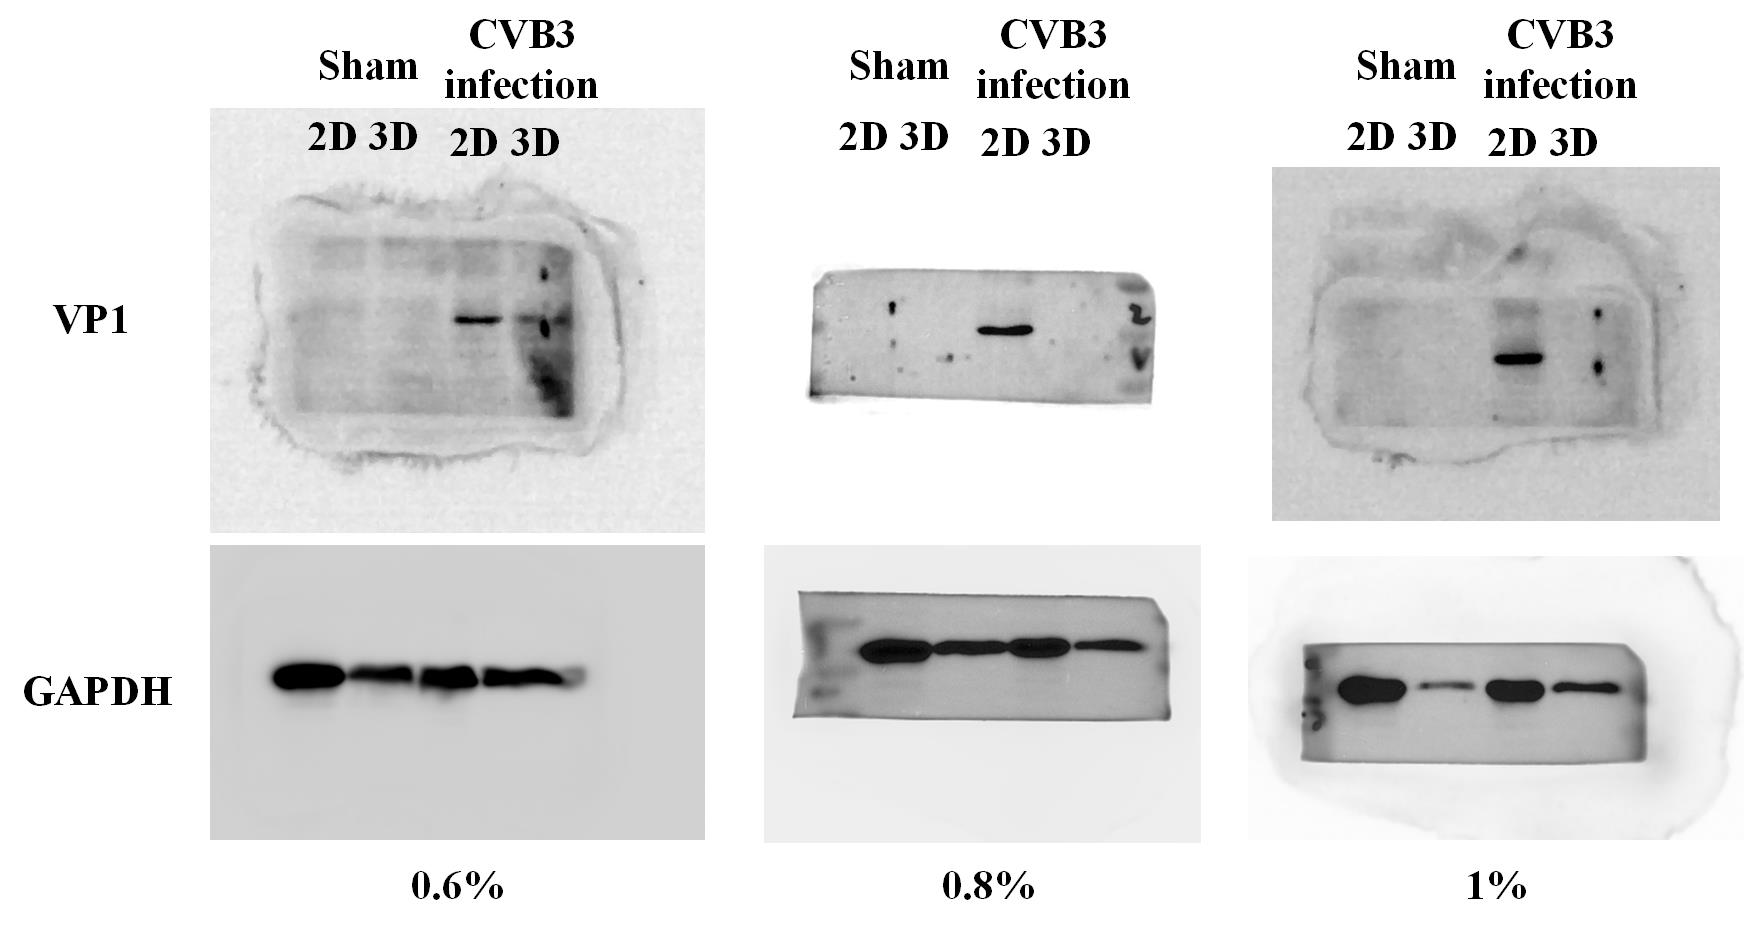
**
